1 GENERAL INFORMATION

2

3 Article Type:

4 Research Article

5

6 Title:

7 Multidimensional plasticity in the Glanville fritillary butterfly: larval performance curves are  
8 temperature, host and family specific.

9

10 Authors:

11 Nadja Verspagen<sup>1,2,3\*</sup>, Suvi Ikonen<sup>3</sup>, Marjo Saastamoinen<sup>1,2</sup> and Erik van Bergen<sup>1,2</sup>

12

13 Affiliations:

14 <sup>1</sup> *Helsinki Institute of Life Science, University of Helsinki, Finland*

15 <sup>2</sup> *Research Centre of Ecological Change, Faculty of Biological and Environmental Sciences,  
16 University of Helsinki, Finland.*

17 <sup>3</sup> *Lammi Biological Station, University of Helsinki, Finland.*

18 Corresponding author:

19 \* Correspondence to Nadja Verspagen (Nadja.verspagen@helsinki.fi)

20

21 Abstract word count: 200

22 Total word count: 4207

23 ABSTRACT

24 Variation in environmental conditions during development can lead to changes in life-history traits  
25 with long-lasting effects. Here, we study environmentally induced variation, i.e. the consequences of  
26 potential maternal oviposition choices, in a suite of life-history traits in pre-diapause larvae of the  
27 Glanville fritillary butterfly. We focus on offspring survival, early growth rates and relative fat  
28 reserves, and pay specific attention to intraspecific variation in the responses (GxExE). Globally, we  
29 found that thermal performance and survival curves varied between diets of two host plants,  
30 suggesting that host modifies the temperature impact, or *vice versa*. Additionally, we show that the  
31 relative fat content has a host-dependent, discontinuous response to developmental temperature. This  
32 implies that a potential switch in resource allocation, from more investment in growth at lower  
33 temperatures to storage at higher temperatures, is dependent on other environmental variables.  
34 Interestingly, we find that a large proportion of the variance in larval performance is explained by  
35 differences among families, or interactions with this variable. Finally, we demonstrate that these  
36 family-specific responses to the host plant remain largely consistent across thermal environments.  
37 Altogether, the results of our study underscore the importance of paying attention to intraspecific trait  
38 variation in the field of evolutionary ecology.

39

40 Keywords: developmental plasticity – GxExE – intraspecific variation – temperature – nutrition –  
41 multidimensional plasticity

42

## 43 1. INTRODUCTION

44 Species can cope with environmental change by avoiding stressful conditions, by producing  
45 phenotypes better adjusted to the new environmental conditions through plasticity, or by adapting to  
46 the novel conditions through evolutionary change [1, 2]. Even though the avoidance of environmental  
47 stress is an effective strategy, e.g. through tracking favourable conditions by expanding to higher  
48 latitudes or altitudes [3], it is often limited by factors such as the distribution of resources, the structure  
49 of the landscape and/or the dispersal ability of the species. Moreover, when environmental changes  
50 are rapid, adaptive evolution may not occur fast enough. In those cases, plasticity can enable species  
51 to persist under the novel conditions, allowing more time for mutations to arise and selection to occur  
52 [4, 5]. Assessing a species' ability to respond plastically to environmental change, and evaluating its  
53 performance when exposed to conditions that are beyond or at the limit of the normal range, could  
54 therefore shed light on whether organisms will be able to persist future conditions.

55 Developmental plasticity is defined as the process through which external conditions, such as  
56 nutrition and temperature, can influence developmental trajectories and lead to irreversible changes  
57 in the adult phenotype [1]. This phenomenon is ubiquitous in nature, especially among taxa that have  
58 sessile life-styles [6-8]. The environmental regulation of development has been studied extensively  
59 using insects, whose pre-adult stages are often immobile and thus must cope with local environmental  
60 conditions. In general, when exposed to higher temperatures, insect larvae tend to grow faster [9, 10]  
61 and the body size of the emerging adults is smaller [9, 11, 12], which might alter performance later  
62 in life. Likewise, nutrition is known to regulate development in insects through nutrient balance [13-  
63 15] and/or the concentration of secondary metabolites in the diet [16].

64 When assessing responses to changes in environmental conditions, it is important to recognise  
65 that the environmental factors that affect the phenotype typically occur simultaneously and  
66 interactively [17]. Hence, plastic responses to one type of environmental stress may be dependent on  
67 the state of another external factor. Such non-additive multidimensional plasticity, in response to  
68 combinations of thermal and nutritional environments, has been demonstrated in moths [14],

69 butterflies [18] and fruit flies [19]. For example, Singh et al. showed that poor host plant quality  
70 mainly influenced development at intermediate temperatures the tropical butterfly *Bicyclus anynana*  
71 [18]. Moreover, significant genetic variation for (multidimensional) plasticity is known to exist in  
72 both natural and laboratory populations [20-22]. This intraspecific variation in the ability to respond  
73 to an environmental cue (GxE), or combinations of cues (GxExE), is hypothesised to be beneficial in  
74 the light of climate change since it facilitates the evolution of wider ranges of environmental tolerance  
75 [23, 24].

76 In this study we focus on environmentally induced variation in a suite of life-history traits in the  
77 Glanville fritillary butterfly (*Melitaea cinxia*). The species occurs at its northern range margin on the  
78 Åland archipelago (SW Finland) where it inhabits a highly fragmented network of habitat patches  
79 that are defined by the presence of at least one of two available host plant species; *Plantago lanceolata*  
80 and *Veronica spicata*, hereafter referred to as *Plantago* and *Veronica*, respectively [25]. Adult  
81 females produce large egg clutches, and the selection of suitable oviposition sites is known to be a  
82 hierarchical process [26, 27]. In the field, gravid females of the Glanville fritillary appear to first  
83 choose habitats that are hot, dry and sunny [28, 29]. Host plant discrimination, with individuals  
84 typically preferring one host species over the other, occurs subsequently [30, 31]. Therefore, selective  
85 mothers can influence the developmental trajectories of their offspring through oviposition site  
86 selection, which in turn may affect offspring performance and fitness [32].

87 Using a full-factorial split-brood design, we explore the consequences of these maternal  
88 oviposition choices for the pre-diapause larvae of *Melitaea cinxia*. We aim to research the (combined)  
89 effects of developmental temperature and host plant on pre-diapause larvae of this species. We  
90 measure the survival, early growth rates and relative fat content of offspring reared at four different  
91 temperatures and on two different host plants, and pay attention to intraspecific variation in the  
92 responses by using individuals from different genetic backgrounds (i.e. families). As shown in other  
93 insects, we expect a large positive effect of developmental temperature on growth rate. Furthermore,  
94 in the scenario of additive multidimensional plasticity, we expect larvae to grow faster and have

95 higher survival on *Veronica* within each thermal environment, as this has previously been  
96 demonstrated under laboratory conditions [16, 33]. Individuals that develop fast, and thus will be  
97 diapausing for longer, are predicted to allocate relatively more resources to fat storage, which is  
98 thought to be the primary fuel for overwintering and post-winter activities. Finally, given that the  
99 natural habitat of this species is heterogeneous and fragmented, we expect family-specific responses  
100 to the environmental factors (GxE, GxExE) to be important determinants of the phenotype.

## 101 2. METHODS

### 102 *Study system*

103 *Melitaea cinxia* is a univoltine species and on the Åland islands adults emerge from their pupae  
104 in June, after which females lay several clutches of 100 – 200 eggs [34]. The sessile pre-diapause  
105 larvae hatch in late June and early July and live gregariously on the host plant of their mothers' choice.  
106 In the beginning of autumn the larvae spin a communal web in which they diapause until spring.  
107 Overwinter survival is impacted by multiple factors, among which body size, with larger larvae  
108 having a higher chance to survive [35]. After diapause, larvae become solitary and can move over  
109 longer distances in search of resources and/or suitable microhabitats [36]. The laboratory population  
110 of *M. cinxia* used in this study was established in 2015 from 136 post-diapause larvae (consisting of  
111 105 unique families) collected from 34 habitat patches across the large network of habitat patches on  
112 the Åland islands.

### 113 *Experimental design*

114 In the spring of 2019, diapausing larvae of the laboratory stock were stimulated to recommence  
115 development, reared to adulthood in small transparent plastic containers, and mated with an unrelated  
116 individual. Subsequently, the gravid females were provided with a single *Plantago* plant for  
117 oviposition, and the host plant was checked daily for newly produced egg clutches. Clutches were  
118 carefully removed, placed in individual petri-dishes, and transferred to a climate-controlled cabinet  
119 set to 28:15 °C and a 12L:12D cycle.

120 Egg clutches of 15 females were divided over eight experimental treatments in two steps, yielding  
121 a full-factorial split-brood design with two diets of different host plants (*Plantago* and *Veronica*) and  
122 four developmental day temperatures (28 °C, 30 °C, 32 °C and 34 °C). First, to ensure the utilization  
123 of a single host plant species throughout development, egg clutches were divided into two equal  
124 groups 3-5 days after oviposition. One of these groups was provided with fresh leaves of *Plantago*  
125 while the other received fresh *Veronica* leaves. All plants were reared under standard conditions

126 (28:15 °C). Second, when approximately 90% of the larvae within each group transitioned from the  
127 first to the second instar, we generated experimental cohorts of 15 siblings. These cohorts were  
128 randomly divided over four climate-controlled chambers (28:15 °C, 30:15 °C, 32:15 °C and 34:15  
129 °C, all with a 12L:12D cycle, and using a Sanyo MLR-350 for the 32 °C treatments and a Sanyo  
130 MLR-351 for the others).

131 Throughout the experiment, larvae were inspected every morning and fresh leaves were provided  
132 to ensure *ad libitum* feeding conditions. For five families, individuals from a second clutch (from the  
133 same parents) were used to complete all experimental treatments. One female did not produce enough  
134 offspring to complete all treatments and these data have been excluded from further analyses. A  
135 schematic representation of the experimental design is given in Figure S1. For further information on  
136 the background of larvae used in the experiment see Table S1.

### 137 *Life-history traits*

138 We studied environmentally induced variation in a suite of life-history traits and focussed on  
139 offspring survival, early growth rates, and the relative amount of fat reserves accumulated during  
140 early development. To assess offspring survival, the larvae within each cohort were counted every  
141 fourth day, and on these days the entire cohort was also weighed to the nearest 0.01 mg (Mettler  
142 Toledo XS105 DualRange) to trace overall mass gain during early development. This procedure was  
143 continued until the first individual of the cohort entered the diapause stage, which can be recognised  
144 by a change in body colour (from pale-brown to black), an increase in larval body hair density, and  
145 the presence of red eyes. From this date forward individual data was collected by recording the day  
146 of entering diapause and the body mass of each diapausing larvae. Subsequently, larvae were frozen  
147 to -80 °C, and stored in eppendorf tubes until further processing.

148 The individual growth rates were calculated according to the formula

$$149 \quad \text{Growth rate} = [\ln(\text{diapause mass}) - \ln(2^{\text{nd}} \text{ instar mass})] / \text{development time}$$

150 where 2<sup>nd</sup> instar mass (i.e. mass at the start of the experiment) was estimated by dividing the mass of  
151 the entire cohort by the number of individuals, and development time was computed as the time  
152 between the start of the experiment and the day the individual entered diapause [37].

153 Relative fat content at diapause was determined for seven randomly chosen individuals per  
154 cohort. These larvae were dried to constant mass (60 °C for 24 h) and weighed to the nearest 0.01  
155 mg, yielding initial dry mass. Triglyceride and free fatty acids were extracted by incubating the dried  
156 body at room temperature in 1:2 (v/v) methanol:dichloromethane for 72 h, followed by drying and  
157 re-weighing, yielding fat-free dry mass [38]. The relative fat content was calculated according to the  
158 formula

$$159 \quad \textit{Relative fat content} = (\textit{initial dry mass} - \textit{fat-free dry mass}) / \textit{initial dry mass}$$

## 160 *Statistical analyses*

161 Interval-censored survival curves were fitted using the *survival* package [39] and plotted using  
162 the *survminer* package [40]. Log-rank tests were performed to determine the influence of temperature  
163 and host plant on survival using the *interval* package [41]. A linear model was fitted to estimate the  
164 effect of temperature and host on the mean amount of body mass gained during early development.  
165 Cohort mass was divided by the number of surviving individuals and log-transformed to improve  
166 normality. The day of the experiment, temperature and host plant (and all interactions) were included  
167 in the full model. Two additional linear models were fitted to estimate the effect of family,  
168 temperature and host (and all interactions) on individual growth rate and relative fat content. For all  
169 models described above, step-wise model selection based on AIC values was performed using the  
170 *step()* function. Post hoc pairwise comparisons (Tukey's HSD;  $\alpha = 0.05$ ) were performed using the  
171 *emmeans* package [42].

172 Intraspecific variation in the responses to the host plant is explored by extracting the slope of a  
173 linear model – with individual growth rate as dependent and host plant as independent variable – for  
174 each family and within each thermal environment. These slopes describe both the magnitude and the



175 direction of the response to the host plant [20]. Using Pearson correlations we test whether host-  
176 induced responses (i.e. the slopes) are family-specific and consistent across thermal environments.  
177 All statistical analyses were performed in R [43].

178 3. RESULTS

179 *Pre-diapause survival and clutch mass*

180 Probability of survival was generally high but dropped considerably for larvae with long  
181 development times (i.e. those that enter diapause in the upper percentiles of the distribution of  
182 development times, Figure 1). The probability of survival was not affected by temperature  
183 (asymptotic logrank two-sample t-test,  $P = 0.3968$  for individuals reared on *Plantago*, and  $P = 0.8678$   
184 for individuals reared on *Veronica*). Survival was significantly lower for larvae that were reared on  
185 *Plantago*, but only for the two highest temperatures (P-values given in Figure 1).

186 We found that both the thermal environment and the host plant interacted with time to affect  
187 mean clutch mass. The effect of temperature on mean clutch mass increases with time  
188 (time:temperature,  $F = 10.5182$ ,  $P < 0.001$ ), with larvae reared at 28 °C being significantly smaller  
189 than those reared at higher temperatures from day 8 onward (Figure 2A). The mean clutch mass of  
190 cohorts reared on *Veronica* increased faster over time compared to those reared on *Plantago*  
191 (time:plant,  $F = 3.9190$ ,  $P = 0.0089$ ). Cohorts using *Veronica* were smaller than those using *Plantago*  
192 at the start of the experiment (day 0; Figure 2A) but larger at the final time point (day 16).

193

194 *Individual growth rates and allocation to fat reserves*

195 For both life-history traits (growth rate and fat content) we found that all main effects and all  
196 interaction terms were statistically significant (see Tables S3 and S4). Averaged over the families,  
197 model-estimated marginal means for the individual growth rates revealed that individuals achieve  
198 higher growth rates on *Veronica*, except for those reared at 34 °C (Figure 2B, Table S3C). Growth  
199 rate increased with temperature until a maximum at 32 °C. At an even higher temperature of 34 °C  
200 growth rate dropped significantly compared to that at 32 °C for larvae fed with *Veronica* (pairwise  
201 comparison:  $P < 0.001$ ). In contrast, the growth rates of larvae reared at 34 °C on *Plantago* were not  
202 significantly different from those of individuals reared at 32 °C (pairwise comparison:  $P = 0.5213$ ).

203 This decrease in growth rate at 34 °C was mainly caused by an increase in development time rather  
204 than a decrease in body mass (Figure S2).

205 The relative fat content showed a discontinuous change to the temperature gradient on both hosts  
206 (Figure 2B, Table S4C). For individuals reared on *Plantago*, development at the two higher  
207 temperatures resulted in significantly higher relative amounts of fat reserves. The thermal threshold  
208 at which change in relative fat content occurs was higher for individuals reared on *Veronica*, where  
209 only development at the highest temperature lead to an increase in relative fat content. As a result of  
210 the difference in threshold we only observed a significant effect of host plant at 32 °C (pairwise  
211 comparison:  $P < 0.001$ ), with larvae utilizing *Plantago* having a higher relative fat content on average.

212

### 213 *Family-specific responses to the host plant*

214 Our results demonstrate that intraspecific variation for multidimensional phenotypic plasticity  
215 (GxExE) is large in this system. For both life-history traits, but especially for the individual growth  
216 rates, the (interactive) effects of environmental cues were highly dissimilar across families. About  
217 12% of the total phenotypic variance ( $V_P$ ) in individual growth rates was explained by the interaction  
218 between the family and the host plant (family:host plant,  $F = 32.2507$ ,  $P < 0.001$ ; see table S3B). In  
219 other words, family-specific responses to the host were an important determinant of the phenotype.  
220 Indeed, some families used in the experiment achieved the highest growth rates on *Veronica* while  
221 individuals from other families grew consistently faster on *Plantago* (Figure 3). These family-specific  
222 reaction norm slopes were positively correlated across thermal environments (*Pearson's r* 0.4-0.8;  
223 Figure S3). Moreover, utilising *Plantago* as a host plant resulted in higher variance in larval growth  
224 rates across families (and not within families; Figure S4).

225

## 226 4. DISCUSSION

227 Using a full factorial design, with fourteen genetic backgrounds (families), four developmental  
228 temperatures and two host plant species, we explored the relative contributions of different sources  
229 of phenotypic variance across a suite of life-history traits in the Glanville fritillary butterfly. We start  
230 this section by describing the general patterns observed in our data, and then discuss how the  
231 developmental trajectories of pre-diapause larvae could be influenced by maternal oviposition site  
232 selection in the wild. Subsequently, we go into the variation in environmental responses observed  
233 among families in our study, and discuss how this genetic variation for (multidimensional) plasticity  
234 may impact the population's ability to persist environmental heterogeneity.

235 In ectotherms, temperature can affect developmental processes directly through changes in  
236 chemical reaction kinematics and the physical properties of membranes [44, 45], which in turn can  
237 impact organismal performance and fitness. Some developing individuals are able to manipulate their  
238 thermal environment, for example by relocating to warmer microhabitats. Alternatively, when  
239 immature life-stages are largely immobile, such as in the case of the Glanville fritillary butterfly, the  
240 optimal thermal environment for development can be realized through selective oviposition choices  
241 of the female. As is true for many butterfly species, Glanville fritillary mothers could regulate the  
242 thermal environment of their offspring by preferring sunny or shady environments for oviposition  
243 [28, 29]. Averaged over the families, our data showed a clear initial increase in growth rate with  
244 increasing temperature, with an optimum around 32 °C. At higher temperatures the growth rate  
245 decreased for larvae reared on *Veronica* and stabilised for those reared on *Plantago*.

246 Maternal preferences to oviposit in sunny habitats, thereby increasing the developmental  
247 temperatures of their offspring, are therefore intuitively considered to be adaptive. However, even  
248 though the average ambient day temperatures on Åland are well below 32 °C during the end of  
249 summer, when pre-diapause larvae are developing (Figure S5), sunshine creates thermal stratification  
250 which can cause the temperatures close to the ground to rise to be between 12 and 20 °C above  
251 ambient temperature [46, 47]. This suggests that the maternal preference for sunny habitat could be

252 maladaptive when the ambient day temperatures on Åland are above 20 °C (see also Salgado, 2020).  
253 In this scenario developmental temperatures in sunny microclimates may rise well above the observed  
254 optimal temperature of 32 °C for larval growth, and potentially even exceed the thermal tolerance  
255 limits of the larvae. It was recently shown that the summer of 2018 was an anomaly in terms of  
256 precipitation, temperature and vegetation productivity across the habitats of the Glanville fritillary  
257 butterfly in Åland, and that this extreme climatic event was associated with a 10-fold demographic  
258 decline of the metapopulation [48]. Though this dramatic decline has been attributed to severe water  
259 deficits during May and July, the record-breaking temperatures observed for July (above 25 °C; figure  
260 S5) could have exceeded the thermal tolerance limits of pre-diapause larvae developing in sunny  
261 environments.

262 In addition to an effect of temperature on growth rates, our data also reveal a general trend in the  
263 relative fat content of the larvae. This physiological trait is important for butterfly life- history[49]  
264 and was quantified for the first time in this species. Relative fat content increases significantly  
265 between 30 and 32 °C for larvae reared on *Plantago*, and between 32 and 34 °C for larvae reared on  
266 *Veronica*. Previous research has shown similar increases in relative fat content with increasing  
267 temperature in other insects [e.g. 50, 51, 52], while other studies have described the opposite pattern  
268 [e.g. 38, 53]. Our hypothesis, stating that individuals predicted to spend more time in diapause, i.e.  
269 those with shorter development times, accumulate more fat during development was therefore  
270 falsified. In fact, the cohorts with the largest relative fat reserves also demonstrated the longest  
271 development times and thus shortest time in diapause (i.e. those reared at 34 °C). Instead, variation  
272 in relative fat content seemed to be associated with the relative investment in growth. Individuals  
273 reared at 32 °C allocated more resources to their fat reserves when they utilized *Plantago* instead of  
274 *Veronica*. At this temperature we also observed the largest difference in host-specific growth rates,  
275 with individuals utilizing *Plantago* demonstrating reduced investment in growth compared to their  
276 siblings reared on *Veronica*. This suggests that individuals of this species trade-off growth for

277 increased investment in fat storage at higher temperatures, and that the thermal threshold for this  
278 switch in life history strategies is influenced by the larval diet.

279       Within the preferred sunny habitats, mothers select one of two available host plants which may  
280 differ in their suitability for larval development. Overall, and in concordance with our hypothesis and  
281 earlier reports [16, 33], we found that pre-diapause larvae perform better on *Veronica* than on  
282 *Plantago*. Though survival in the first instars was high on both plant species, the probability of  
283 survival to diapause was higher for larvae that were reared on *Veronica*, particularly in the two hottest  
284 environments. In addition, individuals on this host achieved higher average growth rates in most  
285 thermal environments. Finally, the larval performances of the families used in this study were very  
286 uniform when utilizing *Veronica*, which was in stark contrast to the high variance in growth rates  
287 observed among families on *Plantago*.

288       Since females can maximize their fitness by laying their eggs on host plants on which the  
289 performance of their offspring is maximized (preference–performance hypothesis), Glanville  
290 fritillary mothers are predicted to prefer *Veronica* when both hosts are available. Interestingly, it has  
291 been shown that females of this species do not necessarily prefer the host plant that is most abundant  
292 in their local environment, but that this preference depends on which host is more abundant at a larger  
293 regional scale [30, 54, 55]. This local adaptation is attributed to the spatial distribution of the two  
294 hosts in the field, with *Plantago* being omnipresent and *Veronica* mainly occurring in habitat patches  
295 in the north-western part of the archipelago. Females from regions where *Veronica* is an abundant and  
296 therefore reliable host plant were observed to prefer *Veronica* when offered a binary choice, while  
297 butterflies in regions where *Veronica* is less reliable preferred to oviposit on *Plantago* [30, 55].

298       It is important to place the observed effects of the host plant on larval performance in the context  
299 of our experimental design; while temperature interacted with the host plant at the level of the insect  
300 herbivore, direct effects of temperature on the host were not assessed. The plants used in the study  
301 were cultivated and kept under greenhouse conditions throughout the experiment, and thus

302 represented a high quality diet for the developing larvae. In nature, the two host plants themselves  
303 may differ in their responses to variation in temperature, and this interspecific variation may affect  
304 the nutritional quality of the available hosts for example in terms of primary nutrients. Additionally,  
305 the two host plants used in this study both produce iridoid glycosides [56] — defence chemicals  
306 known to deter feeding by generalist insect herbivores [57, 58]. Interestingly, these iridoids can also  
307 act as feeding stimulants in specialist butterfly larvae [59, 60], such as *M. cinxia*, and the  
308 concentrations of these secondary compounds are known to be susceptible to variability in  
309 precipitation and temperature in *Plantago* [61]. Thus, in the field, when potential effects of  
310 temperature on the host plant are present, the interacting effects of temperature and host on insect  
311 development demonstrated here could be different.

312 In addition to the more general patterns described above, we found significant genetic variation  
313 for (multidimensional) plasticity in this system. In other words, the phenotypic responses to the  
314 (combination of) environmental variables were highly dissimilar across families (i.e. significant GxE  
315 and GxExE interactions). For example, the interaction between the family and the host plant  
316 explained a large proportion of the variance in individual growth rates, and these family-specific  
317 responses to the host were largely consistent cross thermal environments. While most families grew  
318 faster on *Veronica* (e.g. family 5), others consistently achieved their highest growth rates on *Plantago*  
319 (e.g. family 42). Such intraspecific variation, or in this case variation within the meta-population, for  
320 plasticity is common in both natural and laboratory populations [e.g. 20, 62] and hypothesised to be  
321 beneficial for insects exposed to climate change [63, 64] because it increases their evolutionary  
322 potential [24].

323 As a final note we would like to emphasize that the general patterns described in studies like the  
324 one presented here (i.e. using a relatively small number of families), may be susceptible to bias when  
325 phenotypes vary strongly across genetic backgrounds. For example, using fourteen families we  
326 describe that larvae of *M. cinxia* in general perform better on *Veronica* than on *Plantago*, while this

327 is in fact not the case for all families. Therefore, with a different and/or smaller subset of families we  
328 could potentially have observed different general patterns.

329 In conclusion, we demonstrated that larval performance curves in the Glanville fritillary butterfly  
330 are family-specific and interactively mediated by the thermal and nutritional environment. The results  
331 of our study therefore underscore the importance of studying the multidimensionality of  
332 environmental effects on phenotype expression. In addition, our work demonstrates that intraspecific  
333 variation is likely an important determinant of population-level responses to environmental change  
334 in this system.

335

### 336 ACKNOWLEDGEMENTS

337 We are grateful to Heini Karvinen for practical assistance during the experiments, and Wilco Verberk  
338 for suggestions that greatly improved earlier versions of our manuscript. Financial support was  
339 provided by European Research Council (independent starting grant no. 470 637412 ‘META-  
340 STRESS’ to MS). NV was supported by the Erasmus+ programme of the European Union and a  
341 Lammi Biological Station’s Environmental Research Foundation (LBAYS) grant.

342

### 343 AUTHORS' CONTRIBUTIONS

344 NV, SI, MS and EvB conceived and designed the experiments. NV performed the experiments. NV  
345 and EvB analysed the data and wrote the first draft of the manuscript. All authors provided critical  
346 feedback and helped to shape the research, analyses and manuscript.

347

### 348 DATA ACCESSIBILITY

349 Raw data will be archived in the Dryad Digital Repository upon acceptance of the manuscript.



350 REFERENCES

- 351 1. Beldade P., Mateus A.R.A., Keller R.A. 2011 Evolution and molecular mechanisms of  
352 adaptive developmental plasticity. *Molecular Ecology* **20**(7), 1347-1363. (doi:10.1111/j.1365-  
353 294X.2011.05016.x).
- 354 2. Hoffmann A.A., Sgrò C.M. 2011 Climate change and evolutionary adaptation. *Nature*  
355 **470**(7335), 479-485. (doi:10.1038/nature09670).
- 356 3. Parmesan C., Yohe G. 2003 A globally coherent fingerprint of climate change impacts  
357 across natural systems. *Nature* **421**(6918), 37.
- 358 4. Corl A., Bi K., Luke C., Challa A.S., Stern A.J., Sinervo B., Nielsen R. 2018 The genetic  
359 basis of adaptation following plastic changes in coloration in a novel environment. *Current Biology*  
360 **28**(18), 2970-2977.e2977. (doi:10.1016/j.cub.2018.06.075).
- 361 5. Ghalambor C.K., McKay J.K., Carroll S.P., Reznick D.N. 2007 Adaptive versus non-  
362 adaptive phenotypic plasticity and the potential for contemporary adaptation in new environments.  
363 *Functional Ecology* **21**(3), 394-407. (doi:10.1111/j.1365-2435.2007.01283.x).
- 364 6. Franks S.J., Weber J.J., Aitken S.N. 2014 Evolutionary and plastic responses to climate  
365 change in terrestrial plant populations. *Evolutionary Applications* **7**(1), 123-139.  
366 (doi:10.1111/eva.12112).
- 367 7. Sultan S.E. 2000 Phenotypic plasticity for plant development, function and life history.  
368 *Trends in Plant Science* **5**(12), 537-542. (doi:[https://doi.org/10.1016/S1360-1385\(00\)01797-0](https://doi.org/10.1016/S1360-1385(00)01797-0)).
- 369 8. Telesca L., Michalek K., Sanders T., Peck L.S., Thyrring J., Harper E.M. 2018 Blue mussel  
370 shell shape plasticity and natural environments: a quantitative approach. *Scientific Reports* **8**.  
371 (doi:10.1038/s41598-018-20122-9).
- 372 9. Atkinson D. 1994 Temperature and organism size: a biological law for ectotherms?  
373 *Advances in Ecological Research* **25**, 1-58.
- 374 10. Atkinson D. 1996 Ectotherm life-history responses to developmental temperature. *Animals*  
375 *and temperature: Phenotypic and evolutionary adaptation*, 183-204.

- 376 11. Angilletta M.J., Dunham A.E. 2003 The temperature-size rule in ectotherms: simple  
377 evolutionary explanations may not be general. *The American Naturalist* **162**(3), 332-342.
- 378 12. Dixon A.F.G., Chambers R.J., Dharma T.R. 1982 Factors affecting size in aphids with  
379 particular reference to the black bean aphid, *Aphis fabae*. *Entomologia experimentalis et applicata*  
380 **32**(2), 123-128.
- 381 13. Gray L.J., Simpson S.J., Polak M. 2018 Fruit flies may face a nutrient-dependent life-history  
382 trade-off between secondary sexual trait quality, survival and developmental rate. *Journal of Insect*  
383 *Physiology* **104**, 60-70. (doi:10.1016/j.jinsphys.2017.11.010).
- 384 14. Lee K.P., Roh C. 2010 Temperature-by-nutrient interactions affecting growth rate in an  
385 insect ectotherm. *Entomologia Experimentalis et Applicata* **136**(2), 151-163. (doi:10.1111/j.1570-  
386 7458.2010.01018.x).
- 387 15. Silva-Soares N.F., Nogueira-Alves A., Beldade P., Mirth C.K. 2017 Adaptation to new  
388 nutritional environments: larval performance, foraging decisions, and adult oviposition choices in  
389 *Drosophila suzukii*. *BMC Ecology* **17**. (doi:10.1186/s12898-017-0131-2).
- 390 16. Saastamoinen M., van Nouhuys S., Nieminen M., O'Hara B., Suomi J. 2007 Development  
391 and survival of a specialist herbivore, *Melitaea cinxia*, on host plants producing high and low  
392 concentrations of iridoid glycosides. In *Annales Zoologici Fennici* (pp. 70-80, JSTOR).
- 393 17. Westneat D.F., Potts L.J., Sasser K.L., Shaffer J.D. 2019 Causes and consequences of  
394 phenotypic plasticity in complex environments. *Trends in Ecology & Evolution* **34**(6), 555-568.  
395 (doi:<https://doi.org/10.1016/j.tree.2019.02.010>).
- 396 18. Singh P., van Bergen E., Brattström O., Osbaldeston D., Brakefield P.M., Oostra V. 2019  
397 Complex multi-trait responses to multivariate environmental cues in a seasonal butterfly. *bioRxiv*,  
398 772749. (doi:10.1101/772749).
- 399 19. Kutz T.C., Sgrò C.M., Mirth C.K. 2019 Interacting with change: Diet mediates how larvae  
400 respond to their thermal environment. *Functional Ecology* **33**(10), 1940-1951. (doi:10.1111/1365-  
401 2435.13414).

- 402 20. Lafuente E., Duneau D., Beldade P. 2018 Genetic basis of thermal plasticity variation in  
403 *Drosophila melanogaster* body size. *PLOS Genetics* **14**(9), e1007686.  
404 (doi:10.1371/journal.pgen.1007686).
- 405 21. Mangin B., Casadebaig P., Cadic E., Blanchet N., Boniface M.-C., Carrère S., Gouzy J.,  
406 Legrand L., Mayjonade B., Pouilly N., et al. 2017 Genetic control of plasticity of oil yield for  
407 combined abiotic stresses using a joint approach of crop modelling and genome-wide association.  
408 *Plant, Cell & Environment* **40**(10), 2276-2291. (doi:10.1111/pce.12961).
- 409 22. Nussey D.H., Postma E., Gienapp P., Visser M.E. 2005 Selection on heritable phenotypic  
410 plasticity in a wild bird population. *Science* **310**(5746), 304-306. (doi:10.1126/science.1117004).
- 411 23. Kelly M. 2019 Adaptation to climate change through genetic accommodation and  
412 assimilation of plastic phenotypes. *Philosophical Transactions of the Royal Society B* **374**(1768),  
413 20180176.
- 414 24. Oostra V., Saastamoinen M., Zwaan B.J., Wheat C.W. 2018 Strong phenotypic plasticity  
415 limits potential for evolutionary responses to climate change. *Nature Communications* **9**(1), 1005.  
416 (doi:10.1038/s41467-018-03384-9).
- 417 25. Ojanen S.P., Nieminen M., Meyke E., Pöyry J., Hanski I. 2013 Long-term metapopulation  
418 study of the Glanville fritillary butterfly (*Melitaea cinxia*): survey methods, data management, and  
419 long-term population trends. *Ecology and evolution* **3**(11), 3713-3737.
- 420 26. Friberg M., Olofsson M., Berger D., Karlsson B., Wiklund C. 2008 Habitat choice precedes  
421 host plant choice – niche separation in a species pair of a generalist and a specialist butterfly. *Oikos*  
422 **117**(9), 1337-1344. (doi:10.1111/j.0030-1299.2008.16740.x).
- 423 27. Refsnider J.M., Janzen F.J. 2010 Putting eggs in one basket: Ecological and evolutionary  
424 hypotheses for variation in oviposition-site choice. *Annual Review of Ecology, Evolution, and*  
425 *Systematics* **41**(1), 39-57. (doi:10.1146/annurev-ecolsys-102209-144712).
- 426 28. Rosa E. In preparation Male condition, microhabitat type and plant condition shape female  
427 oviposition preference.

- 428 29. Salgado A.L., DiLeo M.F., Saastamoinen, M. 2020 Narrow oviposition preference of an  
429 insect herbivore risks survival under conditions of severe drought. *BioRxiv*, 005686.  
430 (doi:10.1101/2020.03.24.005686).
- 431 30. Kuussaari M., Singer M.C., Hanski I. 2000 Local specialization and landscape-level  
432 influence on host use in an herbivorous insect. *Ecology* **81**(8), 2177-2187. (doi:10.2307/177106).
- 433 31. Singer M.C., Lee J.R. 2000 Discrimination within and between host species by a butterfly:  
434 implications for design of preference experiments. *Ecology Letters* **3**(2), 101-105.  
435 (doi:10.1046/j.1461-0248.2000.00121.x).
- 436 32. Gibbs M., van Dyck H. 2009 Reproductive plasticity, oviposition site selection, and  
437 maternal effects in fragmented landscapes. *Behavioral Ecology and Sociobiology* **64**(1), 1-11.  
438 (doi:10.1007/s00265-009-0849-8).
- 439 33. van Nouhuys S., Singer M.C., Nieminen M. 2003 Spatial and temporal patterns of  
440 caterpillar performance and the suitability of two host plant species. *Ecological Entomology* **28**(2),  
441 193-202. (doi:10.1046/j.1365-2311.2003.00501.x).
- 442 34. Saastamoinen M. 2007 Life-history, genotypic, and environmental correlates of clutch size  
443 in the Glanville fritillary butterfly. *Ecological Entomology* **32**(2), 235-242. (doi:10.1111/j.1365-  
444 2311.2007.00865.x).
- 445 35. Saastamoinen M., Ikonen S., Wong S.C., Lehtonen R., Hanski I. 2013 Plastic larval  
446 development in a butterfly has complex environmental and genetic causes and consequences for  
447 population dynamics. *Journal of Animal Ecology* **82**(3), 529-539. (doi:  
448 <https://doi.org/10.1111/1365-2656.12034>).
- 449 36. Kuussaari M., Van Nouhuys S., Hellmann J.J., Singer M.C. 2004 Checkerspot butterfly  
450 larval biology. In *On the wings of checkerspot: A model system for population biology* (pp. 138-  
451 160. Oxford, Oxford University Press.

- 452 37. Gotthard K., Nylin S., Wiklund C. 1994 Adaptive variation in growth rate: Life history costs  
453 and consequences in the speckled wood butterfly, *Pararge aegeria*. *Oecologia* **99**(3-4), 281-289.  
454 (doi:<https://doi.org/10.1007/BF00627740>).
- 455 38. van Bergen E., Osbaldeston D., Kodandaramaiah U., Brattström O., Aduse-Poku K.,  
456 Brakefield P.M. 2017 Conserved patterns of integrated developmental plasticity in a group of  
457 polyphenic tropical butterflies. *BMC Evolutionary Biology* **17**(1), 59. (doi:10.1186/s12862-017-  
458 0907-1).
- 459 39. Therneau T.M., Lumley T. 2019 A Package for Survival Analysis in S. (2.44-1.1 ed.
- 460 40. Kassambara A., Kosinski M., Biecek P., Scheipl F. 2019 survminer: Drawing survival  
461 curves using 'ggplot2'. (0.4.4 ed.
- 462 41. Fay M.P., Shaw P.A. 2010 Exact and asymptotic Weighted Logrank Tests for interval  
463 censored data: The interval R Package. *Journal of Statistical Software* **36**(2), 1-34.  
464 (doi:10.18637/jss.v036.i02).
- 465 42. Lenth R., Singmann H., Love J., Buerkner P., Herve M. 2019 Emmeans: Estimated marginal  
466 means, aka least-squares means. (1.3.5.1 ed.
- 467 43. The R Core Team. 2019 R: A language and environment for statistical computing. (Vienna,  
468 Austria, R Foundation for Statistical Computing.
- 469 44. Hazel J.R. 1995 Thermal adaptation in biological membranes: is homeoviscous adaptation  
470 the explanation? *Annual review of physiology* **57**(1), 19-42.
- 471 45. Somero G.N., Hochachka P.W. 1971 Biochemical adaptation to the environment. *American*  
472 *Zoologist* **11**(1), 159-167. (doi:<https://doi.org/10.1093/icb/11.1.159>).
- 473 46. Bennett N.L., Severns P.M., Parmesan C., Singer M.C. 2015 Geographic mosaics of  
474 phenology, host preference, adult size and microhabitat choice predict butterfly resilience to climate  
475 warming. *Oikos* **124**(1), 41-53. (doi:10.1111/oik.01490).
- 476 47. Singer M.C., Parmesan C. 2018 Lethal trap created by adaptive evolutionary response to an  
477 exotic resource. *Nature* **557**(7704), 238-241. (doi:10.1038/s41586-018-0074-6).

- 478 48. van Bergen E., Dallas T., DiLeo M.F., Kahilainen A., Mattila A.L.K., Luoto M.,  
479 Saastamoinen M. 2020 The effect of summer drought on the predictability of local extinctions in a  
480 butterfly metapopulation. *Conservation Biology* (doi:10.1111/cobi.13515).
- 481 49. Boggs C.L., Freeman K.D. 2005 Larval food limitation in butterflies: effects on adult  
482 resource allocation and fitness. *Oecologia* **144**(3), 353-361. (doi:10.1007/s00442-005-0076-6).
- 483 50. Fischer K., Karl I. 2010 Exploring plastic and genetic responses to temperature variation  
484 using copper butterflies. *Climate Research* **43**(1-2), 17-30. (doi:10.3354/cr00892).
- 485 51. Karl I., Stoks R., de Block M., Janowitz S.A., Fischer K. 2011 Temperature extremes and  
486 butterfly fitness: conflicting evidence from life history and immune function. *Global Change*  
487 *Biology* **17**(2), 676-687. (doi:10.1111/j.1365-2486.2010.02277.x).
- 488 52. Krenzel S., Stangl G.I., Brandsch C., Freier B., Klose T., Moll E., Kiowski A. 2012 A  
489 comparative study on effects of normal versus elevated temperatures during preimaginal and young  
490 adult period on body weight and fat body content of mature *Coccinella septempunctata* and  
491 *Harmonia axyridis* (Coleoptera: Coccinellidae). *Environmental Entomology* **41**(3), 676-687.  
492 (doi:<https://doi.org/10.1603/EN11267>).
- 493 53. Kooi R.E., Bergshoeff C., Rossie W., Brakefield P.M. 1997 *Bicyclus anynana* (Lepidoptera:  
494 *Satyrinae*): Comparison of fat content and egg-laying in relation to dry and wet season  
495 temperatures 17-22 p.
- 496 54. Hanski I. 2011 Eco-evolutionary spatial dynamics in the Glanville fritillary butterfly.  
497 *Proceedings of the National Academy of Sciences* **108**(35), 14397-14404.  
498 (doi:10.1073/pnas.1110020108).
- 499 55. Hanski I., Singer M.C. 2001 Extinction-colonization dynamics and host-plant choice in  
500 butterfly metapopulations. *The American Naturalist* **158**(4), 341-353. (doi:10.1086/321985).
- 501 56. Suomi J., Wiedmer S.K., Jussila M., Riekkola M.-L. 2002 Analysis of eleven iridoid  
502 glycosides by micellar electrokinetic capillary chromatography (MECC) and screening of plant

- 503 samples by partial filling (MECC)—electrospray ionisation mass spectrometry. *Journal of*  
504 *Chromatography A* **970**(1), 287-296. (doi:[https://doi.org/10.1016/S0021-9673\(02\)00381-3](https://doi.org/10.1016/S0021-9673(02)00381-3)).
- 505 57. Biere A., Marak H.B., van Damme J.M.M. 2004 Plant chemical defense against herbivores  
506 and pathogens: generalized defense or trade-offs? *Oecologia* **140**(3), 430-441. (doi:10.1007/s00442-  
507 004-1603-6).
- 508 58. Pankoke H., Dobler S. 2015 Low rates of iridoid glycoside hydrolysis in two Longitarsus  
509 leaf beetles with different feeding specialization confer tolerance to iridoid glycoside containing  
510 host plants. *Physiological Entomology* **40**(1), 18-29. (doi:10.1111/phen.12085).
- 511 59. Bowers M.D. 1983 The role of iridoid glycosides in host-plant specificity of checkerspot  
512 butterflies. *Journal of Chemical Ecology* **9**(4), 475-493. (doi:10.1007/BF00990220).
- 513 60. Bowers M.D. 1984 Iridoid glycosides and host-plant specificity in larvae of the buckeye  
514 butterfly, *Junonia coenia* (Nymphalidae). *Journal of Chemical Ecology* **10**(11), 1567-1577.  
515 (doi:10.1007/BF00988425).
- 516 61. Orians C.M., Schweiger R., Dukes J.S., Scott E.R., Müller C. 2019 Combined impacts of  
517 prolonged drought and warming on plant size and foliar chemistry. *Annals of Botany* **124**(1), 41-52.  
518 (doi:10.1093/aob/mcz004).
- 519 62. Nokelainen O., Bergen E., Ripley B., Brakefield P. 2018 Adaptation of a tropical butterfly  
520 to a temperate climate. *Biological Journal of the Linnean Society* **123**, 279-289.  
521 (doi:10.1093/biolinnean/blx145).
- 522 63. Sgro C.M., Terblanche J.S., Hoffmann A.A. 2016 What can plasticity contribute to insect  
523 responses to climate change? *Annu Rev Entomol* **61**, 433-451. (doi:10.1146/annurev-ento-010715-  
524 023859).
- 525 64. Williams S.E., Shoo L.P., Isaac J.L., Hoffmann A.A., Langham G. 2008 Towards an  
526 integrated framework for assessing the vulnerability of species to climate change. *PLoS biology*  
527 **6**(12), 2621-2626. (doi:10.1371/journal.pbio.0060325).



529 FIGURE LEGENDS

530 **Figure 1** Kaplan-Meier survival probability over time for larvae reared on *Plantago* (green) and  
531 *Veronica* (purple), at four different day temperatures. Shaded area represents the 95% confidence  
532 interval. Grey lines show the mean day of diapause, and the distribution of diapausing day is given  
533 in the upper panels. The probability of survival is not affected by temperature, but, at the two highest  
534 day temperatures, survival is significantly lower for larvae that were reared on *Plantago* (P-values  
535 given in the figure).

536

537 **Figure 2** Environmentally induced variation in life-history traits. **A)** Dots depict the mean clutch  
538 mass, log-transformed and corrected for number of individuals, in each thermal environment (x-axis),  
539 for *Plantago* (green) and *Veronica* (purple), on four assessment days (from left to right: day 0 [i.e.  
540 2<sup>nd</sup> instar mass], day 4, day 8 and day 12). Significant differences between thermal treatments  
541 (Tukey's HSD,  $\alpha = 0.05$ ) are indicated by different letters. Details of the statistical test can be found  
542 in Table S2. **B)** Model-estimated marginal means for the individual growth rates (left;  $R^2 = 0.5964$ )  
543 and the relative fat content (right;  $R^2 = 0.4992$ ). Error bars represent 95% confidence intervals and  
544 significant differences between groups (Tukey's HSD,  $\alpha = 0.05$ ), averaged over the families, are  
545 indicated by different letters. Details of statistical tests can be found in Tables S3 and S4.

546

547 **Figure 3** Host-induced responses in growth rates vary across families, but are consistent across  
548 thermal environments. **A)** Panels demonstrate the individual growth rates on *Plantago* and *Veronica*  
549 of three representative families. Siblings of some families consistently achieve higher growth rates  
550 on *Veronica* (upper panels; yellow), while individuals from other families demonstrate an equal  
551 performance on each host plant (central panels; orange) or even grow faster on *Plantago* (lower  
552 panels; red). **B)** Norms of reaction to the host plant for all families included in the experiment,  
553 coloured families correspond to those given in panel A. The reaction norm slopes, describing both the



554 magnitude and the direction of the response, are family-specific and correlate strongly across thermal  
555 environments (for details see Figure S3A). Utilising *Plantago* leads to higher between-family  
556 variance in growth rates (for details see Figure S3B).

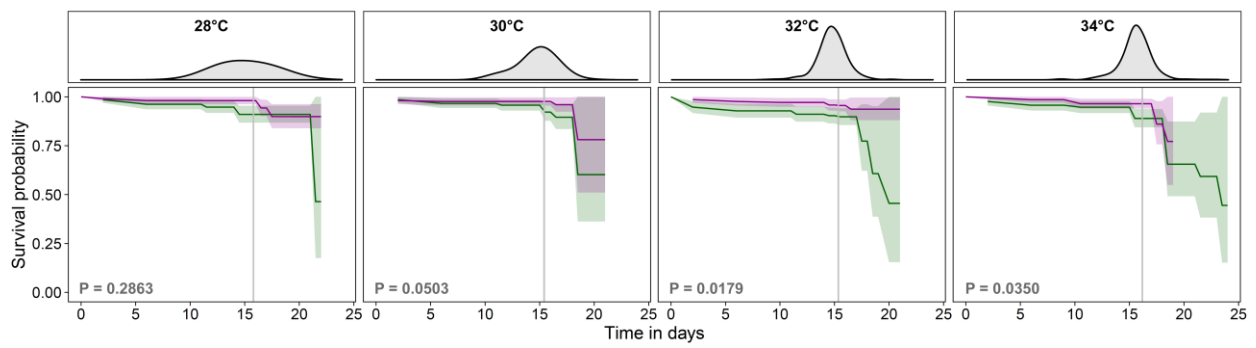

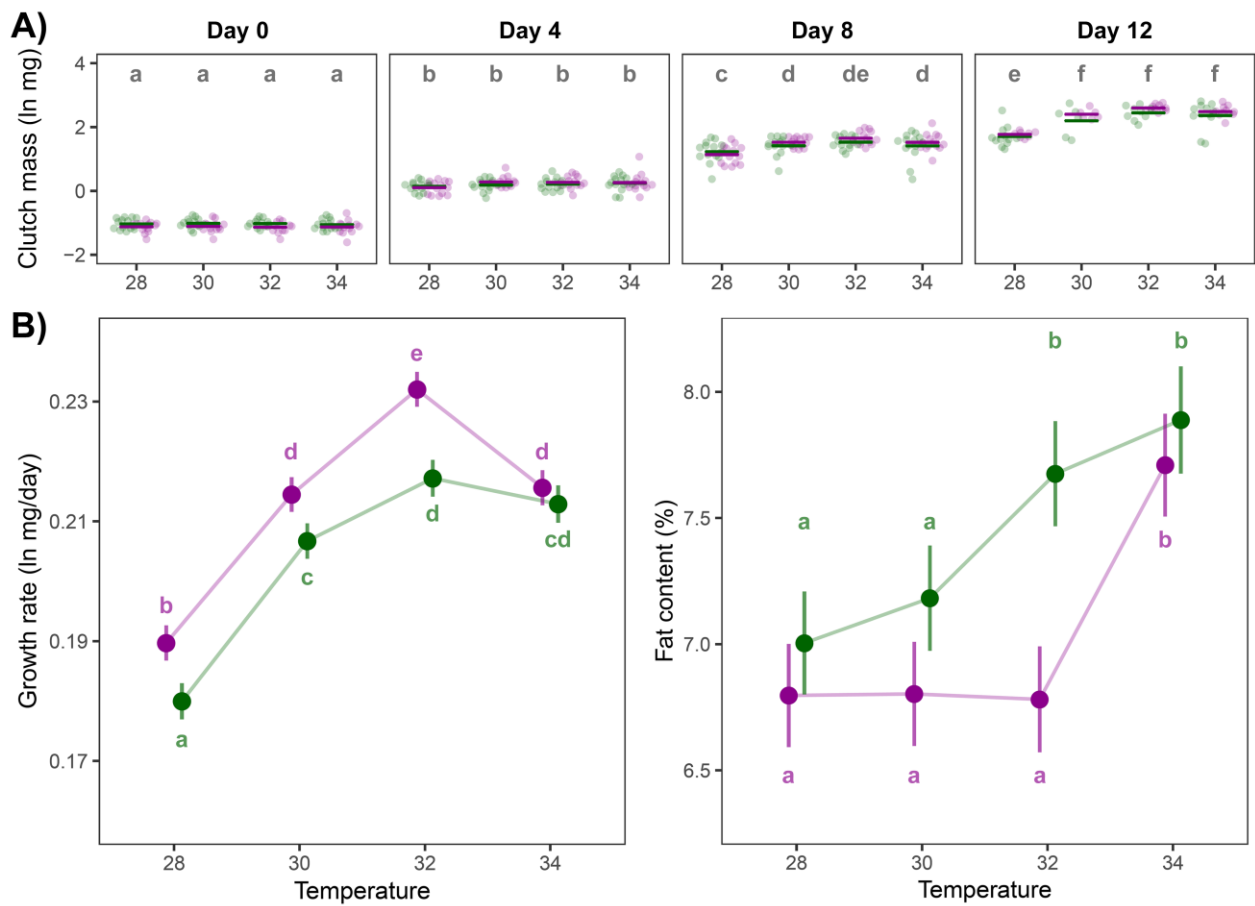

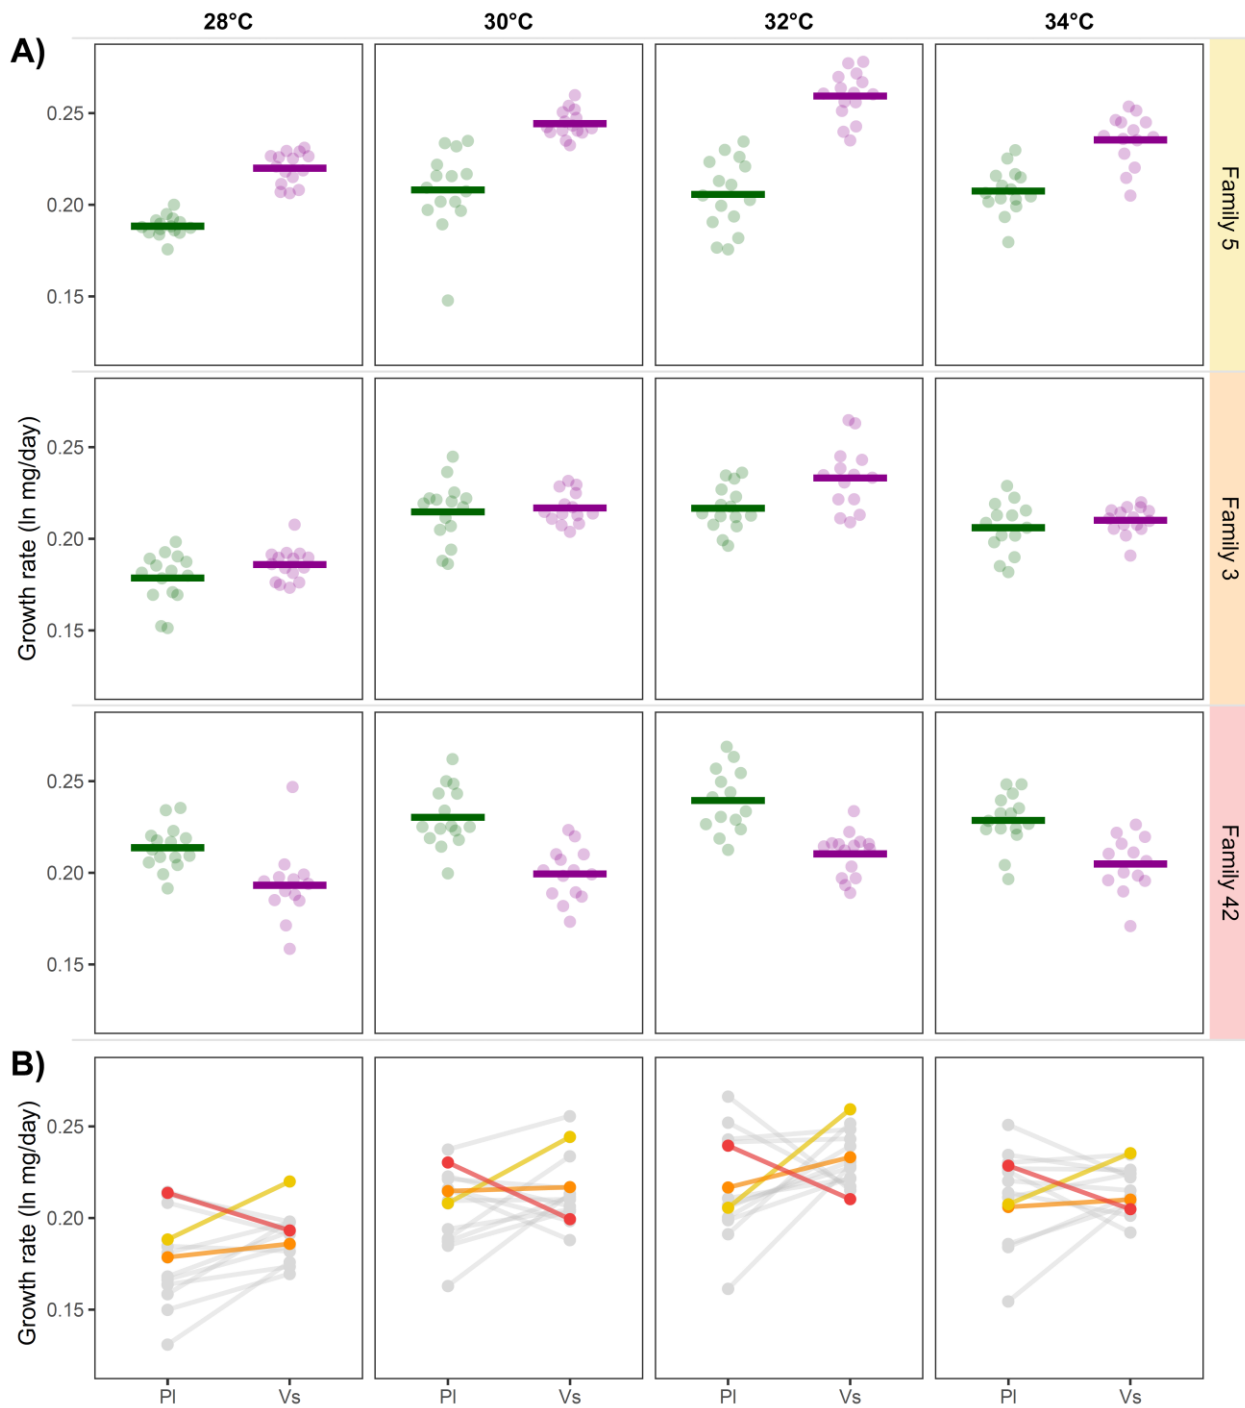

## SUPPLEMENTARY MATERIALS

### TITLE:

*Multidimensional plasticity in the Glanville fritillary butterfly: larval performance curves are temperature, host and family specific.*

### AUTHORS:

Nadja Verspagen, Suvi Ikonen, Marjo Saastamoinen and Erik van Bergen.

### CONTENTS

Figure S1: Experimental design.

Figure S2: Mean development time and diapause mass per developmental temperature and host plant.

Figure S3: Family specific responses to host plant.

Figure S4: Minimum, mean and maximum temperatures in Åland.

Table S1: Background of larvae used in the experiment.

Table S2: Linear model for mean clutch mass.

Table S3: Linear model for individual growth rates.

Table S4: Linear model for individual fat content.

Table S5: Linear model for individual development time.

Table S6: Linear model for individual diapause mass.

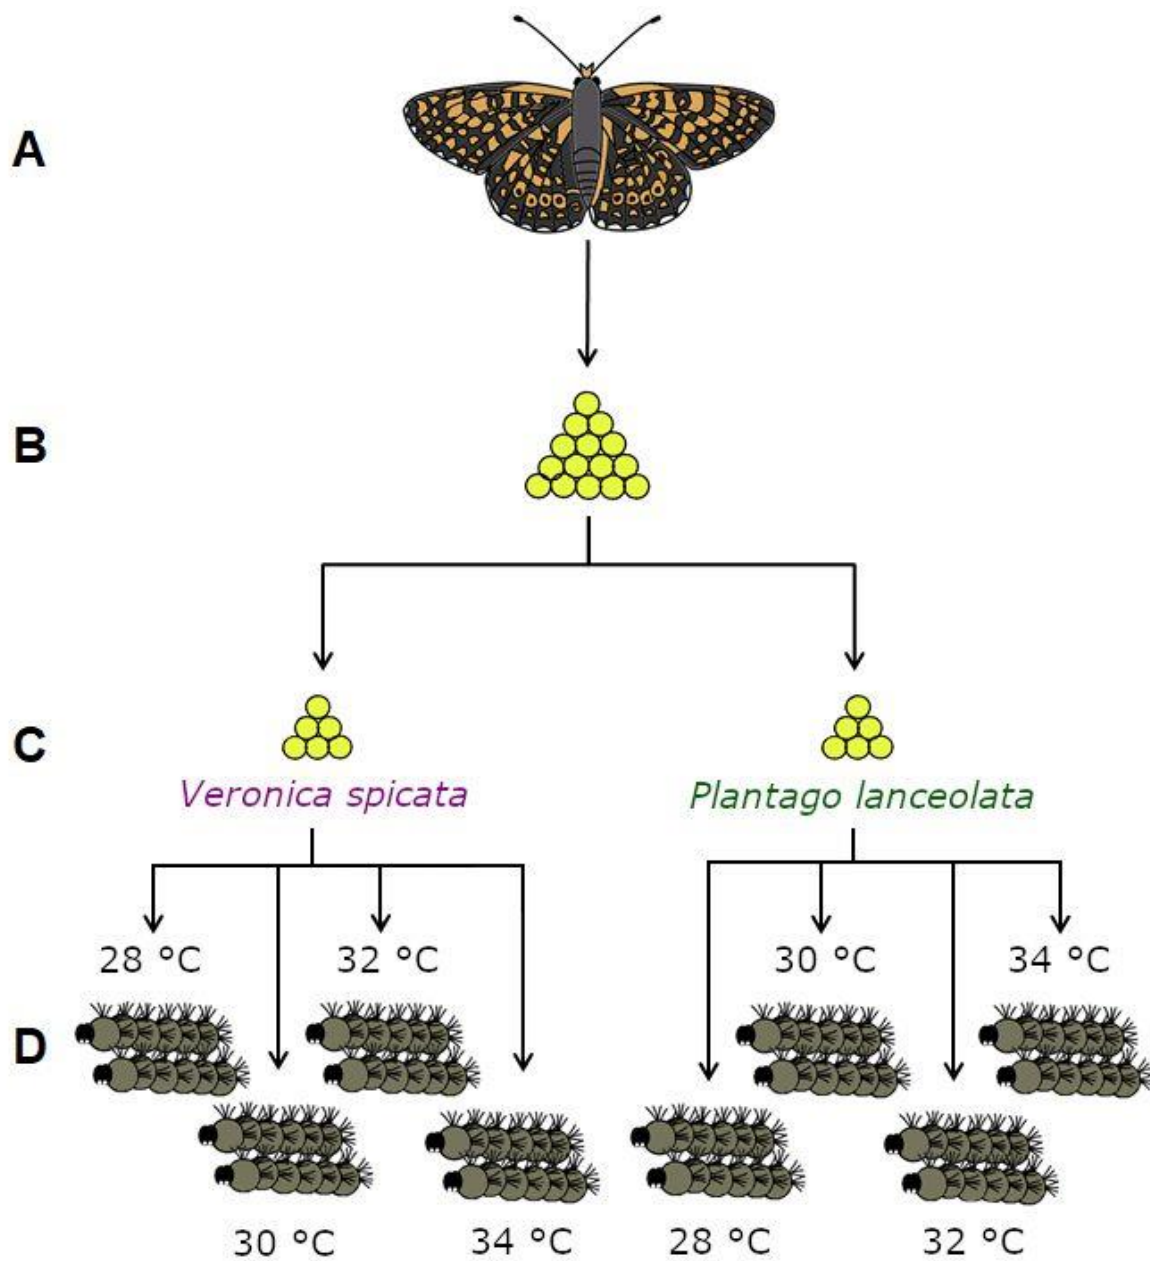

**Figure S1:** Schematic outline of the experimental design. The egg clutch of one female (A + B) was split over two host plants (C), and further divided over four temperature treatments upon transitioning to the second instar (15 larvae per treatment, D). This was done for offspring of 15 females from different families.

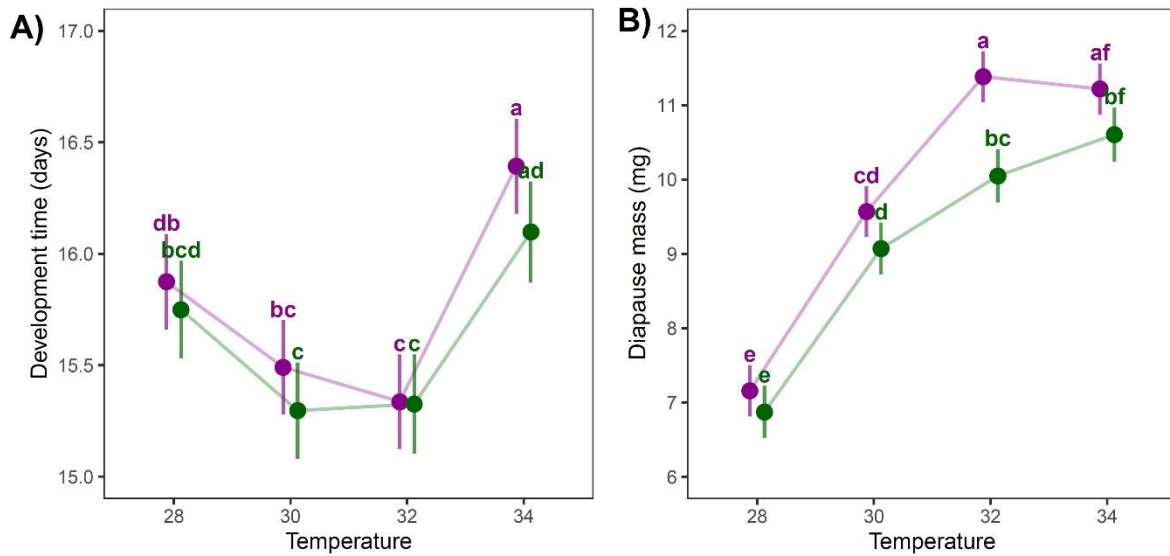

**Figure S2:** Environmentally induced variation in life history traits. Model-estimated marginal means for the individual **A)** development time ( $R^2 = 0.3941$ ) and **B)** diapause mass ( $R^2 = 0.5283$ ). Error bars represent 95% confidence intervals and significant differences between groups (Tukey's HSD,  $\alpha = 0.05$ ), averaged over the families, are indicated by different letters. Details of statistical tests can be found in Tables S5 and S6.

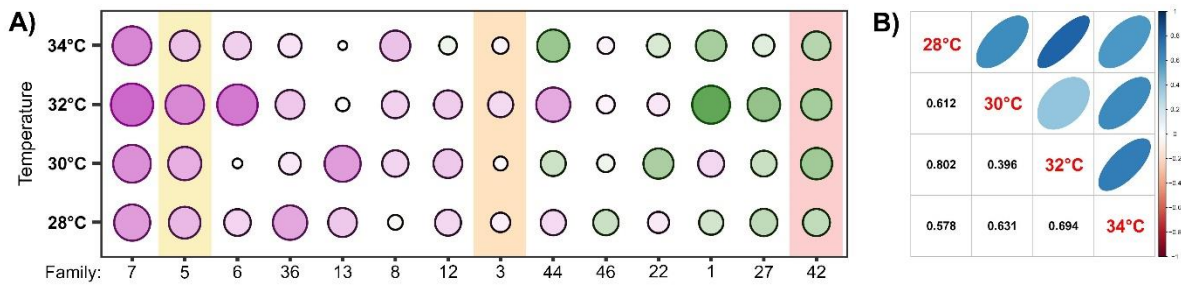

**Figure S3:** Family-specific responses to the host plant. **A)** Some families consistently achieve higher growth rates on *Veronica* while other families, regardless of the thermal environment, grow consistently faster on *Plantago*. The size of the symbol depicts the magnitude of the host-induced response, with steeper reaction norm slopes represented by larger symbols. The direction of the response to the host plant is represented by the colour of the symbol, with higher growth rates on *Veronica* depicted in purple and higher growth rates on *Plantago* in green. Highlighted families correspond to those given in figure 3A of the main text. **B)** Pearson's correlation coefficients among the host-induced reaction norm slopes were positive and ranged between 0.4 and 0.8. The host-induced responses are therefore family-specific and largely consistent across thermal environments.



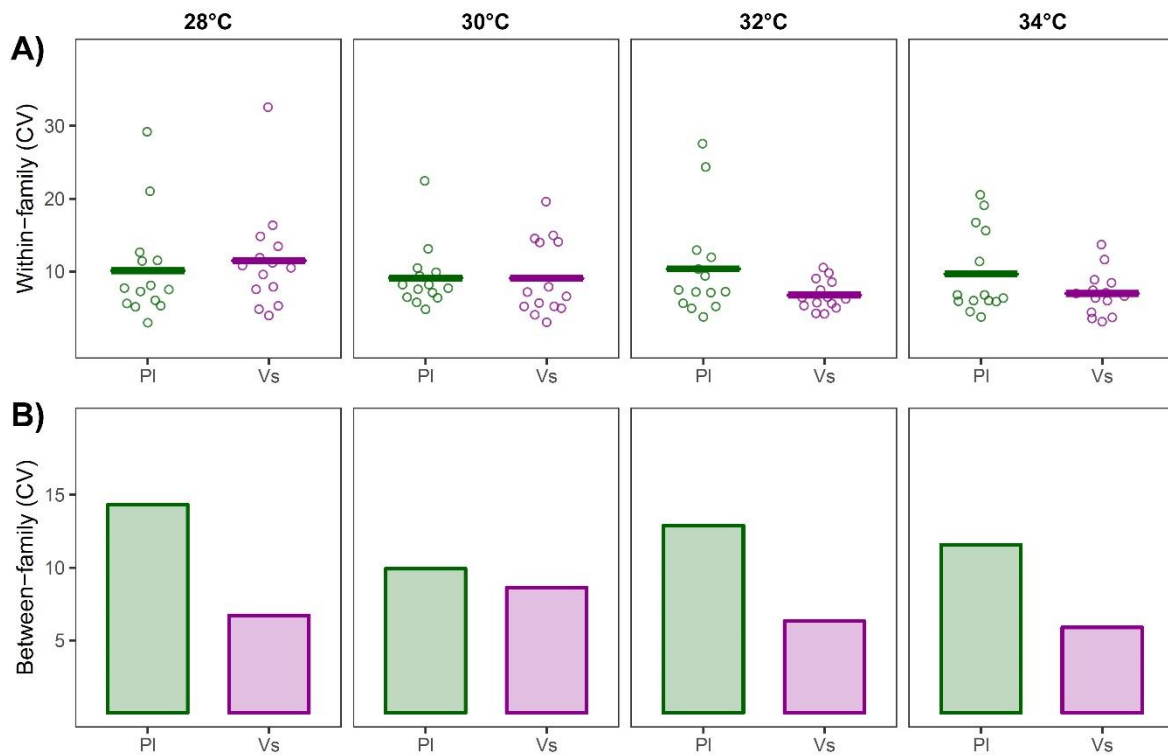

**Figure S4:** **A)** Variance in larval growth rates within families (CV; standard deviation divided by the mean for each family) was similar between host treatments. **B)** Utilising *Plantago* as a host plant resulted in higher variance in larval growth rates across families (CV; standard deviation of family means divided by the global mean growth rate, calculated for each temperature treatment separately)

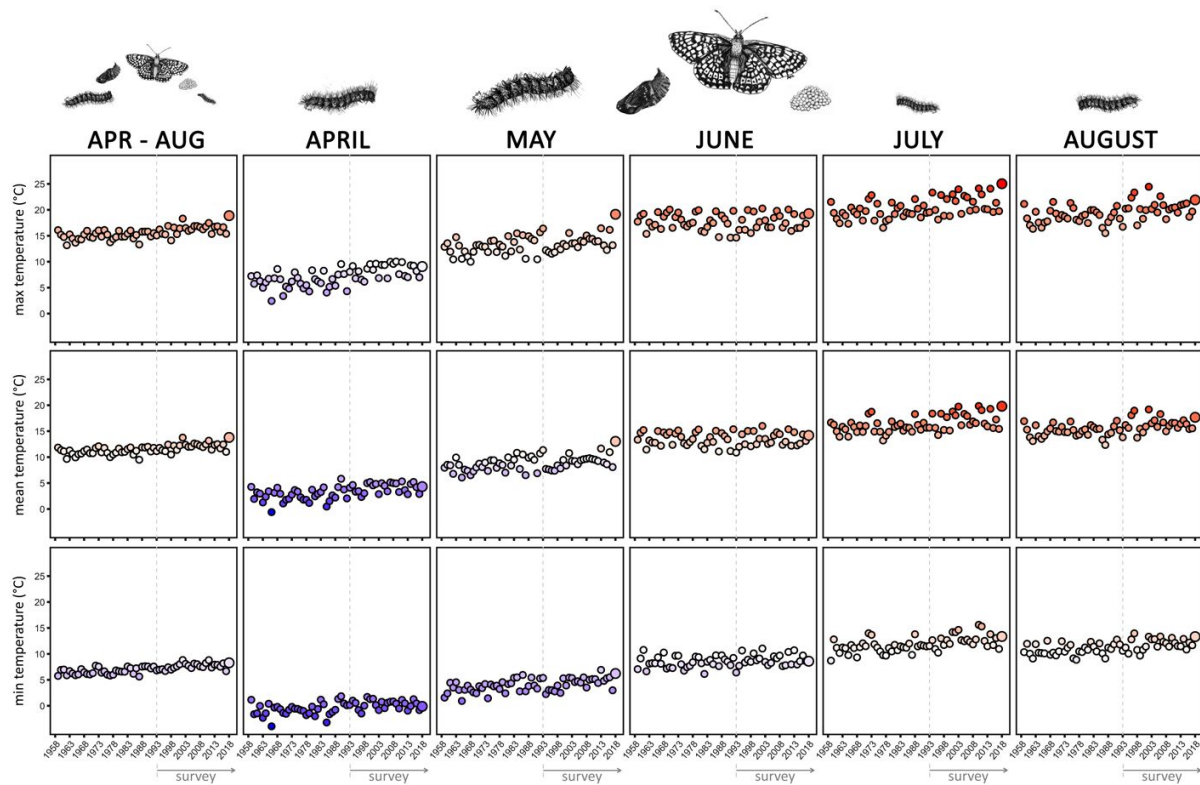

**Figure S5:** Minimum, mean and maximum temperatures in Åland in the months April until August for years between 1958 and 2018. Symbol colour gradient indicates temperature, with cold temperatures represented by blue and warm temperatures indicated by red. The pictures above the panels show the presence of butterfly life-stages per time period, with post diapause larvae being present in April and May, after which they pupate and emerge as adults who lay their eggs in June. Pre-diapause larvae then develop in July and August. Temperature data was derived from the Jomala climate station database in Åland. Illustrations courtesy of Luisa Woestmann.



**Table S2:** Linear model for mean clutch mass (related to Figure 2A in the main text). **A)** Minimum adequate model (in bold) was obtained using the *step()* function, starting from the full model. **B)** Anova table for the minimum adequate model. **C)** Model-estimated marginal means, as well as upper and lower confidence limits, for all experimental treatments. Significant differences experimental groups (Tukey's HSD,  $\alpha = 0.05$ ), averaged over the families and host plants, were obtained using the package *emmeans* and are indicated by different letters.

| <b>A</b>                      |                                                                                        | AIC            |
|-------------------------------|----------------------------------------------------------------------------------------|----------------|
| $M_{full}$                    | $\text{Ln}(\text{mass}) \sim t * T * \text{HP}$                                        | -1162.5        |
| $M_1$                         | $\text{Ln}(\text{mass}) \sim t + T + \text{HP} + t:T + t:\text{HP} + T:\text{HP}$      | -1177.6        |
| <b><math>M_{final}</math></b> | <b><math>\text{Ln}(\text{mass}) \sim t + T + \text{HP} + t:T + t: \text{HP}</math></b> | <b>-1179.8</b> |
| $M_3$                         | $\text{Ln}(\text{mass}) \sim t + T + \text{HP} + t:T + T:\text{HP}$                    | -1171.2        |
| $M_4$                         | $\text{Ln}(\text{mass}) \sim t + T + \text{HP} + t:\text{HP} + T:\text{HP}$            | -1107.7        |
| $M_5$                         | $\text{Ln}(\text{mass}) \sim t + T + \text{HP} + t:T$                                  | -1173.6        |
| $M_6$                         | $\text{Ln}(\text{mass}) \sim t + T + \text{HP} + t: \text{HP}$                         | -1111.8        |

t = time-point; T = temperature; HP = host plant.

| <b>B</b>               | Df  | Sum Sq   | Mean Sq  | F value   | P value  | % exp   |
|------------------------|-----|----------|----------|-----------|----------|---------|
| Time-point             | 3   | 615.2663 | 205.0888 | 3768.1423 | < 0.0001 | 94.9792 |
| Temperature            | 3   | 5.2870   | 1.7623   | 32.3799   | < 0.0001 | 0.8162  |
| Plant                  | 1   | 0.1098   | 0.1098   | 2.0169    | 0.1564   | 0.0169  |
| Time-point:Temperature | 9   | 5.1522   | 0.5725   | 10.5182   | < 0.0001 | 0.7954  |
| Time-point:Plant       | 3   | 0.6399   | 0.2133   | 3.9190    | 0.0089   | 0.0988  |
| Residuals              | 392 | 21.3354  | 0.0544   |           |          | 3.2936  |

| <b>C</b> | Temperature | Time-point | Mean    | LCL      | UCL      | Group |
|----------|-------------|------------|---------|----------|----------|-------|
|          | 28 °C       | 0          | -1.0789 | -1.16619 | -0.99152 | a     |
|          | 30 °C       | 0          | -1.0636 | -1.15095 | -0.97628 | a     |
|          | 32 °C       | 0          | -1.0795 | -1.16684 | -0.99217 | a     |
|          | 34 °C       | 0          | -1.0926 | -1.17996 | -1.00529 | a     |
|          | 28 °C       | 4          | 0.1221  | 0.03477  | 0.20944  | a     |
|          | 30 °C       | 4          | 0.2316  | 0.14423  | 0.31890  | a     |
|          | 32 °C       | 4          | 0.2416  | 0.15425  | 0.32891  | a     |
|          | 34 °C       | 4          | 0.2509  | 0.16352  | 0.33819  | a     |
|          | 28 °C       | 8          | 1.1837  | 1.09635  | 1.27102  | b     |
|          | 30 °C       | 8          | 1.4689  | 1.38152  | 1.55619  | bc    |
|          | 32 °C       | 8          | 1.5895  | 1.50220  | 1.67687  | cg    |
|          | 34 °C       | 8          | 1.4655  | 1.37820  | 1.55287  | cd    |
|          | 28 °C       | 12         | 1.7373  | 1.63179  | 1.84272  | g     |
|          | 30 °C       | 12         | 2.2997  | 2.16625  | 2.43306  | e     |
|          | 32 °C       | 12         | 2.5193  | 2.41542  | 2.62313  | fe    |
|          | 34 °C       | 12         | 2.4235  | 2.32922  | 2.51788  | e     |

**Table S3:** Linear model for individual growth rates (related to Figure 2B in the main text). **A)** Minimum adequate model (in bold) was obtained using the *step()* function, starting from the full model. **B)** Anova table for the minimum adequate model. **C)** Model-estimated marginal means, as well as upper and lower confidence limits, for all experimental treatments. Significant differences experimental groups (Tukey's HSD,  $\alpha = 0.05$ ), averaged over the families, were obtained using the package *emmeans* and are indicated by different letters.

| <b>A</b>                |                                              | AIC             |
|-------------------------|----------------------------------------------|-----------------|
| <b>M<sub>full</sub></b> | <b>Growth rate ~ F * T * HP</b>              | <b>-11924.0</b> |
| M <sub>2</sub>          | Growth rate ~ F + T + HP + F:T + F:HP + T:HP | -11812.0        |

F = family; T = temperature; HP = host plant.

| <b>B</b>                 | Df   | Sum Sq | Mean Sq | F value  | P value  | % exp   |
|--------------------------|------|--------|---------|----------|----------|---------|
| Family                   | 13   | 0.2363 | 0.0182  | 41.6611  | < 0.0001 | 15.1482 |
| Temperature              | 3    | 0.3266 | 0.1089  | 249.5829 | < 0.0001 | 20.9423 |
| Plant                    | 1    | 0.0279 | 0.0279  | 63.9802  | < 0.0001 | 1.7895  |
| Family:Temperature       | 39   | 0.0664 | 0.0017  | 3.9012   | < 0.0001 | 4.2555  |
| Family:Plant             | 13   | 0.1829 | 0.0141  | 32.2507  | < 0.0001 | 11.7265 |
| Temperature:Plant        | 3    | 0.0086 | 0.0029  | 6.5948   | 0.0002   | 0.5534  |
| Family:Temperature:Plant | 39   | 0.0815 | 0.0021  | 4.7893   | < 0.0001 | 5.2243  |
| Residuals                | 1443 | 0.6295 | 0.0004  |          |          | 40.3603 |

| <b>C</b> | Temperature | Plant | Mean   | LCL    | UCL    | Group |
|----------|-------------|-------|--------|--------|--------|-------|
|          | 28 °C       | Pl    | 0.1800 | 0.1770 | 0.1830 | e     |
|          | 30 °C       | Pl    | 0.2067 | 0.2038 | 0.2097 | c     |
|          | 32 °C       | Pl    | 0.2172 | 0.2141 | 0.2202 | b     |
|          | 34 °C       | Pl    | 0.2129 | 0.2098 | 0.2160 | bc    |
|          | 28 °C       | Vs    | 0.1897 | 0.1868 | 0.1926 | d     |
|          | 30 °C       | Vs    | 0.2145 | 0.2116 | 0.2174 | b     |
|          | 32 °C       | Vs    | 0.2320 | 0.2291 | 0.2349 | a     |
|          | 34 °C       | Vs    | 0.2156 | 0.2127 | 0.2185 | b     |

Pl = *Plantago*; Vs = *Veronica*

**Table S4:** Linear model for individual fat content (related to Figure 2B in the main text). **A)** Minimum adequate model (in bold) was obtained using the *step()* function, starting from the full model. **B)** Anova table for the minimum adequate model. **C)** Model-estimated marginal means, as well as upper and lower confidence limits, for all experimental treatments. Significant differences experimental groups (Tukey's HSD,  $\alpha = 0.05$ ), averaged over the families, were obtained using the package *emmeans* and are indicated by different letters.

| <b>A</b>                                                    | AIC          |
|-------------------------------------------------------------|--------------|
| <b>M<sub>full</sub> Fat content ~ F * T * HP</b>            | <b>184.1</b> |
| M <sub>2</sub> Fat content ~ F + T + HP + F:T + F:HP + T:HP | 236.5        |

F = family; T = temperature; HP = host plant.

| <b>B</b>                 | Df  | Sum Sq   | Mean Sq | F value | P value  | % exp   |
|--------------------------|-----|----------|---------|---------|----------|---------|
| Family                   | 13  | 175.3395 | 13.4877 | 12.1996 | < 0.0001 | 11.4766 |
| Temperature              | 3   | 95.9078  | 31.9693 | 28.9162 | < 0.0001 | 6.2775  |
| Plant                    | 1   | 33.0864  | 33.0864 | 29.9267 | < 0.0001 | 2.1656  |
| Family:Temperature       | 39  | 204.0132 | 5.2311  | 4.7315  | < 0.0001 | 13.3534 |
| Family:Plant             | 13  | 102.8951 | 7.9150  | 7.1591  | < 0.0001 | 6.7349  |
| Temperature:Plant        | 3   | 16.7780  | 5.5927  | 5.0586  | 0.0018   | 1.0982  |
| Family:Temperature:Plant | 39  | 134.7115 | 3.4541  | 3.1243  | < 0.0001 | 8.8174  |
| Residuals                | 692 | 765.0626 | 1.1056  |         |          | 50.0763 |

| <b>C</b> | Temperature | Plant | Mean   | LCL    | UCL    | Group |
|----------|-------------|-------|--------|--------|--------|-------|
|          | 28 °C       | Pl    | 7.0044 | 6.8002 | 7.2086 | a     |
|          | 30 °C       | Pl    | 7.1823 | 6.9734 | 7.3912 | a     |
|          | 32 °C       | Pl    | 7.6754 | 7.4670 | 7.8838 | b     |
|          | 34 °C       | Pl    | 7.8885 | 7.6758 | 8.1012 | b     |
|          | 28 °C       | Vs    | 6.7918 | 6.5859 | 6.9977 | a     |
|          | 30 °C       | Vs    | 6.7932 | 6.5857 | 7.0007 | a     |
|          | 32 °C       | Vs    | 6.7812 | 6.5715 | 6.9909 | a     |
|          | 34 °C       | Vs    | 7.7098 | 7.5061 | 7.9136 | b     |

Pl = *Plantago*; Vs = *Veronica*

**Table S5:** Linear model for individual development time (related to Figure S1A in the supplementary materials). **A)** Minimum adequate model (in bold) was obtained using the step() function, starting from the full model. **B)** Anova table for the minimum adequate model. **C)** Model-estimated marginal means, as well as upper and lower confidence limits, for all experimental treatments. Significant differences experimental groups (Tukey's HSD,  $\alpha = 0.05$ ), averaged over the families, were obtained using the package emmeans and are indicated by different letters.

| <b>A</b>                |                                                   | AIC           |
|-------------------------|---------------------------------------------------|---------------|
| <b>M<sub>full</sub></b> | <b>Development time ~ F * T * HP</b>              | <b>1417.6</b> |
| M <sub>2</sub>          | Development time ~ F + T + HP + F:T + F:HP + T:HP | 1477.7        |

F = family; T = temperature; HP = host plant.

| <b>B</b>                 | Df   | Sum Sq    | Mean Sq | F value   | P value  | % exp   |
|--------------------------|------|-----------|---------|-----------|----------|---------|
| Family                   | 13   | 734.6413  | 56.5109 | 24.338672 | < 0.0001 | 13.2852 |
| Temperature              | 3    | 185.8150  | 61.9383 | 26.676229 | < 0.0001 | 3.3603  |
| Plant                    | 1    | 13.3771   | 13.3771 | 5.7614    | 0.0165   | 0.2419  |
| Family:Temperature       | 39   | 361.1477  | 9.2602  | 3.988275  | < 0.0001 | 6.5309  |
| Family:Plant             | 13   | 566.0942  | 43.5457 | 18.754705 | < 0.0001 | 10.2372 |
| Temperature:Plant        | 3    | 7.2857    | 2.4286  | 1.045963  | 0.3712   | 0.1318  |
| Family:Temperature:Plant | 39   | 310.9925  | 7.9742  | 3.434394  | < 0.0001 | 5.6239  |
| Residuals                | 1443 | 3350.4369 | 2.3219  |           |          | 60.5889 |

| <b>C</b> | Temperature | Plant | Mean   | LCL     | UCL     | Letter |
|----------|-------------|-------|--------|---------|---------|--------|
|          | 28 °C       | PI    | 15.749 | 15.5310 | 15.9677 | bcd    |
|          | 30 °C       | PI    | 15.297 | 15.0809 | 15.5122 | c      |
|          | 32 °C       | PI    | 15.326 | 15.1041 | 15.5487 | c      |
|          | 34 °C       | PI    | 16.098 | 15.8717 | 16.3241 | ad     |
|          | 28 °C       | Vs    | 15.875 | 15.6611 | 16.0883 | db     |
|          | 30 °C       | Vs    | 15.492 | 15.2816 | 15.7014 | bc     |
|          | 32 °C       | Vs    | 15.337 | 15.1255 | 15.5479 | c      |
|          | 34 °C       | Vs    | 16.393 | 16.1801 | 16.6061 | a      |

PI = *Plantago*; Vs = *Veronica*

**Table S6:** Linear model for individual diapause mass (related to Figure S1B in the supplementary materials). **A)** Minimum adequate model (in bold) was obtained using the *step()* function, starting from the full model. **B)** Anova table for the minimum adequate model. **C)** Model-estimated marginal means, as well as upper and lower confidence limits, for all experimental treatments. Significant differences experimental groups (Tukey's HSD,  $\alpha = 0.05$ ), averaged over the families, were obtained using the package *emmeans* and are indicated by different letters.

| <b>A</b>                |                                                | AIC           |
|-------------------------|------------------------------------------------|---------------|
| <b>M<sub>full</sub></b> | <b>Diapause mass ~ F * T * HP</b>              | <b>2891.9</b> |
| M <sub>2</sub>          | Diapause mass ~ F + T + HP + F:T + F:HP + T:HP | 2938.8        |

F = family; T = temperature; HP = host plant.

| <b>B</b>                 | Df   | Sum Sq    | Mean Sq   | F value  | P value  | % exp   |
|--------------------------|------|-----------|-----------|----------|----------|---------|
| Family                   | 13   | 3564.6910 | 274.2070  | 45.7602  | < 0.0001 | 19.4455 |
| Temperature              | 3    | 3797.6067 | 1265.8689 | 211.2507 | < 0.0001 | 20.7160 |
| Plant                    | 1    | 169.6805  | 169.6805  | 28.3166  | < 0.0001 | 0.9256  |
| Family:Temperature       | 39   | 758.5425  | 19.4498   | 3.2458   | < 0.0001 | 4.1379  |
| Family:Plant             | 13   | 608.4506  | 46.8039   | 7.8107   | < 0.0001 | 3.3191  |
| Temperature:Plant        | 3    | 63.2488   | 21.0829   | 3.5184   | 0.0146   | 0.3450  |
| Family:Temperature:Plant | 39   | 722.6794  | 18.5302   | 3.0924   | < 0.0001 | 3.9422  |
| Residuals                | 1443 | 8646.8305 | 5.9923    |          |          | 47.1687 |

| <b>C</b> | Temperature | Plant | Mean    | LCL     | UCL     | Letter |
|----------|-------------|-------|---------|---------|---------|--------|
|          | 28 °C       | Pl    | 6.8730  | 6.5222  | 7.2238  | e      |
|          | 30 °C       | Pl    | 9.0712  | 8.7248  | 9.4176  | d      |
|          | 32 °C       | Pl    | 10.0496 | 9.6925  | 10.4067 | bc     |
|          | 34 °C       | Pl    | 10.6042 | 10.2408 | 10.9677 | bf     |
|          | 28 °C       | Vs    | 7.1585  | 6.8154  | 7.5016  | e      |
|          | 30 °C       | Vs    | 9.5695  | 9.2323  | 9.9067  | cd     |
|          | 32 °C       | Vs    | 11.3837 | 11.0444 | 11.7230 | a      |
|          | 34 °C       | Vs    | 11.2182 | 10.8760 | 11.5603 | af     |

Pl = *Plantago*; Vs = *Veronica*
